# Supplementary material for: Structural basis of diversity and homodimerization specificity of zinc-finger-associated domains in Drosophila
Source: PubMed Central journal article supplement — Nucleic Acids Res. 2021 Feb 8;49(4):2375–89. doi: 10.1093/nar/gkab061 (PMC7913770; doi:10.1093/nar/gkab061), 2021-02-08
Supplement: gkab061_supplemental_file.pdf [file gkab061_supplemental_file.pdf]

Supplemental Information

**Structural basis of diversity of Zinc-Finger-Associated Domains (ZAD)  
that mainly form homodimers in *Drosophila melanogaster***

Artem Bonchuk, Konstantin Boyko, Anna Fedotova, Alena Nikolaeva, Sofia Lushchekina, Anastasia Khrustaleva, Vladimir Popov, Pavel Georgiev\*

## ***SUPPLEMENTARY METHODS***

### **Molecular dynamics simulations**

The lengths of productive MD trajectories were chosen based on RMSD evolution. While 300 ns of MD simulation was enough to achieve a stable RMSD level for the CG2712 homodimer and CG2712–Zw5 heterodimer, for the Zw5 homodimer, RMSD was increasing during first 300 ns; thus, the trajectory was prolonged up to 500 ns (Supplementary Figure S6).

Using 100 ns SMD runs allow the dimer dissociation process to occur closer to equilibrium. During the first 20 ns of pulling, the dimer structure is ruptured, but contact between monomers persists for up to 50-60 ns of simulation, after which the monomers are moving far enough to lose interactions first, followed by electrostatic influence when the distance becomes bigger than the cutoff radius.

## SUPPLEMENTARY TABLES

**Supplementary Table S1.** Primers used for cloning. Restriction enzyme sites are shown in small letters, the corresponding enzymes are noted in brackets. Nucleotide substitutions in mutagenic primers are also shown in small letters.

CG10321 ZAD d: GGgaattcATGGATCGCAAGAAGGTCCTG (*EcoRI*)  
CG10321 ZAD r: GGctcgagTACCAGTGCCACGGTAAGACC (*XhoI*)  
CG17328 ZAD d: GGgaattcATGGACTATAATATCCACAAAATATGC (*EcoRI*)  
CG17328 ZAD r: AActcgagCTGGCGCCAGGATTCCAGAAT (*XhoI*)  
CG6654 ZAD d: GGgaattcATGGATGTGGACAAGATCTGTC (*EcoRI*)  
CG6654 ZAD r: GGctcgagGCTATCGGGCTCCTCCG (*XhoI*)  
CG6808 ZAD d: GGgaattcATGGAAATCAGCATTAAATGGAGC (*EcoRI*)  
CG6808 ZAD r: GGctcgagTGCCGATGCGGAGGACAGA (*XhoI*)  
wek ZAD d: GGgaattcATGGGAGTTCCACAAGCGATT (*EcoRI*)  
wek ZAD r: GGctcgagGCTATCCTGCGGCTCCGAGT (*XhoI*)  
Pita ZAD dir: GGgaattcAACATGGCCGCGAACTGGA (*EcoRI*)  
Pita ZAD rev TTctcgagGGGCGCACGGGGCTTCTCC (*XhoI*)  
Grau ZAD dir: GGgaattcAACATGGATATCTGCCGCCTC (*EcoRI*)  
Zw5 ZAD dir: GGgaattcAACATGATGAATAGCAAGATCGCC (*EcoRI*)  
Zw5d AAActcgagGGAAGCGGATAAGGACA (*XhoI*)  
9793ZADd TTgaattcATGGAAGGAAAAGTGTGTCCG (*EcoRI*)  
9793ZADr TCctcgagGGGAATGGAGCAACTCCC (*XhoI*)  
9797ZADd AAgaattcAAGAGCACCTGCCGCG (*EcoRI*)  
9797ZADr CTctcgagATCCCAAGAGTAGCTCAC (*XhoI*)  
15073ZADd ATgaattcATGATTTGCCGTTTGTGC (*EcoRI*)  
15073ZADr TGctcgagTTTCGGTGAGCAAACGATG (*XhoI*)  
2712ZADd TTcaattgATGACGACCATGTGCG (*MunI*)  
2712ZADr TTctcgagTCTGCCGAGAATTCTGTC (*XhoI*)  
17328ZADr AActcgagGATATTGTCGCAGTCGGAG (*XhoI*)  
8145cDNAAd AAcaattgATGTTAATAAATGTGTGCCGAG  
8145\_90r TACActcgagTTTCCTCGCTGGCTCCAC (*XhoI*)  
8159cDNAAd ACTgaattcATGCTGCAAAATGTGTGCCG (*EcoRI*)  
8159\_93r TATCctcgagGACGAAGTGGAGCGGAATG (*XhoI*)  
31457gDNAAd AAgaattcATGAATGTTTGTGCGCTGTGC (*EcoRI*)  
31457\_90r TAGCctcgagCCTCCTCCACTTCACTCAG (*XhoI*)  
7386gDNAAd ATTgaattcATGGAGCTCAAGTACTCCGTC (*EcoRI*)  
7386\_101r TATGctcgagAATCATCAGCTATAGATTCCG (*XhoI*)  
10269gDNAAd AAgaattcATGAACGAGGGCAGGCAG (*EcoRI*)  
10269\_107r TATActcgagAGTCCTGCACGGCAACGTTG (*XhoI*)  
10270gDNAAd TTGgaattcATGAATGAGGAGAGCCAGTAC (*EcoRI*)  
10270\_111r TAGTctcgagCCTCGCCCGGCAGATCC (*XhoI*)  
1792\_98r TAAActcgagTCTCCACACCAACTGCGAAG (*XhoI*)  
11695cDNAAd TGTgaattcATGATATGCCGCCTGTGCC (*EcoRI*)  
11695\_89r TATGctcgagCGTCCTCGGAGAACGGC (*XhoI*)  
11696cDNAAd TTTgaattcATGATATGCCGACTCTGCC (*EcoRI*)  
11696\_95r TATGctcgagTCAGTTCGGGCAGCTCCG (*XhoI*)  
18764cDNAAd ACTgaattcATGGCGCTCCAGTGCCG (*EcoRI*)  
18764\_96r TATGctcgagATGCCATCTCCTCAACATC (*XhoI*)  
11762cDNAAd TTAgaattcATGCTGAACATCGTGTGTAGAG (*EcoRI*)  
11762\_83r TACActcgagAAGAGTCGTCCTCGATGG (*XhoI*)  
dv2712d TGAcaattgATGTCCATTTGCGAGGACAC (*MunI*)  
dv2712\_95r TTAAGgtcgacGCTTTCTAAGCAGATGGTCCG (*SalI*)  
dvZw5d AAggaattcATGATGAGCGGCAGCAAATC (*EcoRI*)  
dvZw5\_96r TTAAGgtcgacCAATTTCTCGAGGCCAG (*SalI*)  
31365d GACgaattcATGGATGCACAGCCG (*EcoRI*)  
31365\_101r TTAATctcgagAGAAGACGCGGCTTCGC (*XhoI*)  
Zw5D57Ed GCCGCAAGAgGGCGCCGCC  
Zw5D57Er GGCGGCGCCcTCTTGCGGC  
S82MH84ld CAAGCGGAtgGTCatTCGCATGG  
S82MH84lr GCGAatGACcaTCCGCTTGAATTC  
2712V16Td GTGCCGCacGTGCCACACAG  
2712V16Tr CTGTGTGGCACgtGCGGCACAAG

2712M86Sd CCATCGCtcGGACAGAATTCTGC  
2712M86Sr ATTCTGTCCgaGCGATGGACAC  
2712 E58Sd CTAGAGGCGtcGCTCTTCCTGC  
2712 E58Sr CAGGAAGAGCgaCGCCTCTAGG  
Zw5M82Sd CAAGCGCtcGGTCATCGATTCCG  
Zw5M82Sr GAATCGATGACCgaGCGCTTGAAG  
4707d GGTgaattcATGACTGTCTGTGTGCTC (*EcoRI*)  
4707\_90r GATgtcgacCTCTGTCTGACCGAAAATTC (*Sall*)  
4282d CAAGAattcATGGATTCTCCTAGCTG (*EcoRI*)  
4282\_89r TAGgtcgacATCCTCCATGAGCGC (*Sall*)  
10654\_29d ACCgaattcATGGATGGATGCGATGG (*EcoRI*)  
10654r\_135r CGAgtcgacGTCCAAGTCGTGCCAAG (*Sall*)  
17568d ATTgaattcATGACGGACGGCAGC (*EcoRI*)  
17568\_91r TGTgtcgacTCGCCGCAGGACCTCAAAG (*Sall*)  
10274d ACAgaattcATGCAGGAGGAGGCC (*EcoRI*)  
10274\_97r TGGgtcgacAAAGACGTTCTGGCCAC (*Sall*)



**Supplementary Table S2.** Data collection, processing and refinement.

| Dataset                                                    | Remote                           | Peak                   |
|------------------------------------------------------------|----------------------------------|------------------------|
| <b>Data collection</b>                                     |                                  |                        |
| Diffraction source                                         | BL41XU, Spring8                  |                        |
| Wavelength (Å)                                             | 0.9                              | 1.28268                |
| Temperature (K)                                            | 100                              |                        |
| Detector                                                   | PILATUS 6M                       |                        |
| Crystal-to-detector distance (mm)                          | 360                              | 360                    |
| Rotation range per image (°)                               | 0.5                              | 0.5                    |
| Total rotation range (°)                                   | 110                              | 360                    |
| Exposure time per image (s)                                | 0.1                              | 0.1                    |
| Space group                                                | P4 <sub>1</sub> 2 <sub>1</sub> 2 |                        |
| <i>a</i> , <i>b</i> , <i>c</i> (Å)                         | 97.65                            | 97.65 48.48            |
| $\alpha$ , $\beta$ , $\gamma$ (°)                          | 90.00                            | 90.00 90.00            |
| Resolution range (Å)                                       | 97.65-2.0 (2.05-2.0)             | 97.49-2.43 (2.53-2.43) |
| Completeness (%)                                           | 98.9 (99.7)                      | 99.9 (100.0)           |
| Average redundancy                                         | 7.4 (7.8)                        | 21.7 (23.6)            |
| $\langle I/\sigma(I) \rangle$                              | 9.5 (4.4)                        | 28.6 (14.2)            |
| R <sub>meas</sub> (%)                                      | 19.5 (80.9)                      | 9.9 (25.5)             |
| CC <sub>1/2</sub>                                          | 99.3 (94.7)                      | 99.9 (99.4)            |
| Overall <i>B</i> factor from Wilson plot (Å <sup>2</sup> ) | 11.7                             | 18.6                   |
| <b>Refinement</b>                                          |                                  |                        |
| <i>R</i> <sub>fact</sub> (%)                               | 16.0                             |                        |
| <i>R</i> <sub>free</sub> (%)                               | 19.2                             |                        |
| Bonds (Å)                                                  | 0.02                             |                        |
| Angles (°)                                                 | 2.27                             |                        |
| Ramachandran plot                                          |                                  |                        |
| Most favoured (%)                                          | 100                              |                        |
| Allowed (%)                                                | 0                                |                        |
| PDB entry code                                             | 6FP5                             |                        |

Values for the highest resolution shell are given in parentheses

**Supplementary Table S3.** Binary interactions between ZADs tested with yeast two-hybrid assay.

| Cluster        | Protein 1        | Protein 2       | Y2H interactions | identity positions, % | consensus positions, % |
|----------------|------------------|-----------------|------------------|-----------------------|------------------------|
| 1              | CG31457 (1-90)   | CG3941 (1-111)  | +                | 39                    | 52                     |
|                | CG31457 (1-90)   | CG31365 (1-103) | -                | 39                    | 51                     |
|                | CG17328 (1-109)  | CG10321 (1-90)  | -                | 35                    | 51                     |
|                | CG31365 (1-103)  | CG3941 (1-111)  | -                | 35                    | 49                     |
| 2              | CG8145 (1-90)    | CG11762 (1-83)  | -                | 40                    | 61                     |
|                | CG8145 (1-90)    | CG8159 (1-93)   | +                | 45                    | 60                     |
|                | CG1792 (1-98)    | CG18764 (1-96)  | +                | 49                    | 57                     |
|                | CG8159 (1-93)    | CG11762 (1-83)  | -                | 35                    | 56                     |
|                | CG9797 (9-114)   | CG8159 (1-93)   | +                | 39                    | 55                     |
|                | CG9793 (1-124)   | CG8159 (1-93)   | -                | 43                    | 53                     |
|                | CG9793 (1-124)   | CG11762 (1-83)  | -                | 35                    | 52                     |
|                | CG18764 (1-96)   | CG9793 (1-124)  | -                | 43                    | 52                     |
|                | CG18764 (1-96)   | CG9797 (9-114)  | -                | 40                    | 52                     |
|                | CG9793 (1-124)   | CG9797 (9-114)  | -                | 40                    | 51                     |
|                | CG9793 (1-124)   | CG8145 (1-90)   | -                | 33                    | 51                     |
|                | CG9797 (9-114)   | CG11762 (1-83)  | -                | 35                    | 49                     |
|                | CG1792 (1-98)    | CG9797 (9-114)  | -                | 36                    | 49                     |
|                | CG1792 (1-98)    | CG9793 (1-124)  | -                | 39                    | 48                     |
| CG9797 (9-114) | CG8145 (1-90)    | -               | 29               | 48                    |                        |
| 3              | CG10269 (1-107)  | CG10270 (1-111) | +                | 75                    | 86                     |
|                | CG10274 (1-97)   | CG10270 (1-111) | +                | 65                    | 81                     |
|                | CG10274 (1-97)   | CG10269 (1-107) | +                | 61                    | 80                     |
|                | CG7386 (1-101)   | CG10269 (1-107) | +                | 52                    | 70                     |
|                | CG7386 (1-101)   | CG10270 (1-111) | +                | 49                    | 66                     |
|                | CG10274 (1-97)   | CG7386 (1-101)  | -                | 43                    | 61                     |
|                | CG10654 (29-135) | CG7386 (1-101)  | -                | 31                    | 46                     |
|                | CG10654 (29-135) | CG10269 (1-107) | -                | 31                    | 44                     |
|                | CG10654 (29-135) | CG10270 (1-111) | -                | 29                    | 42                     |
| 4              | CG11695 (1-89)   | CG11696 (1-95)  | +                | 58                    | 65                     |
|                | CG17568 (1-91)   | CG4148 (1-90)   | -                | 46                    | 62                     |
|                | CG33133 (1-125)  | CG11695 (1-89)  | +                | 35                    | 49                     |
|                | CG15073 (1-95)   | CG33133 (1-125) | +                | 42                    | 48                     |
|                | CG33133 (1-125)  | CG17568 (1-91)  | -                | 24                    | 47                     |
|                | CG15073 (1-95)   | CG11695 (1-89)  | -                | 30                    | 44                     |
|                | CG15073 (1-95)   | CG11696 (1-95)  | -                | 28                    | 42                     |
|                | CG17568 (1-91)   | CG11696 (1-95)  | -                | 26                    | 41                     |
|                | CG33133 (1-125)  | CG11696 (1-95)  | -                | 27                    | 41                     |
|                | CG33133 (1-125)  | CG4148 (1-90)   | -                | 18                    | 37                     |
|                | CG17568 (1-91)   | CG11695 (1-89)  | -                | 25                    | 36                     |

|                |                |   |    |    |
|----------------|----------------|---|----|----|
| CG15073 (1-95) | CG4148 (1-90)  | - | 15 | 36 |
| CG11695 (1-89) | CG4148 (1-90)  | - | 22 | 32 |
| CG15073 (1-95) | CG17568 (1-91) | - | 18 | 31 |
| CG11696 (1-95) | CG4148 (1-90)  | - | 17 | 31 |

**Supplementary Table S4.** Dimerization interfaces of CG2712 and Grauzone ZADs as revealed by their crystal structures.

|                                                                                        | Buried area, Å <sup>2</sup> | Residue 1 (monomer A)                                                                   | Atom | Residue (monomer B) | Atom | Distance, Å |       |
|----------------------------------------------------------------------------------------|-----------------------------|-----------------------------------------------------------------------------------------|------|---------------------|------|-------------|-------|
| <b>CG2712</b>                                                                          | 1150                        | <b>Hydrogen bonds</b>                                                                   |      |                     |      |             |       |
|                                                                                        |                             | 1                                                                                       | H84  | NE2                 | S50  | O           | 2.81  |
|                                                                                        |                             | 2                                                                                       | S50  | O                   | H84  | NE2         | 2.76  |
|                                                                                        |                             | <b>Salt bridges</b>                                                                     |      |                     |      |             |       |
|                                                                                        |                             | 1                                                                                       | E78  | OE1                 | K72  | NZ          | 3.41* |
|                                                                                        |                             | 2                                                                                       | R91  | NH2                 | E58  | OE1         | 2.64  |
|                                                                                        |                             | 3                                                                                       | R91  | NH1                 | E58  | OE2         | 2.87  |
|                                                                                        |                             | 4                                                                                       | E58  | OE1                 | R91  | NH2         | 2.74  |
|                                                                                        |                             | 5                                                                                       | E58  | OE2                 | R91  | NH1         | 2.88  |
|                                                                                        |                             | <b>Hydrophobic interactions (<math>\Delta G^{\text{int}} = -18.2</math> kcal/mol)**</b> |      |                     |      |             |       |
| V16, H18, L46, L52, L61, P62, K72, L73, L75, F79, V83, M86, L90                        |                             |                                                                                         |      |                     |      |             |       |
| <b>Grauzone</b>                                                                        | 1039                        | <b>Hydrogen bonds</b>                                                                   |      |                     |      |             |       |
|                                                                                        |                             | 1                                                                                       | R5   | O                   | Q74  | NE2         | 2.81  |
|                                                                                        |                             | 2                                                                                       | L6   | O                   | Q74  | NE2         | 2.70  |
|                                                                                        |                             | 3                                                                                       | Q74  | NE2                 | L6   | O           | 2.70  |
|                                                                                        |                             | 4                                                                                       | Q74  | NE2                 | R5   | O           | 2.81  |
|                                                                                        |                             | <b>Hydrophobic interactions (<math>\Delta G^{\text{int}} = -19.6</math> kcal/mol)**</b> |      |                     |      |             |       |
| Q71, F63, I48, Y67, F66, F40, C7, E47, L8, F38, W39, Y77, H37, I70, A73, V60, C56, Q59 |                             |                                                                                         |      |                     |      |             |       |

\* - Side chain of Glu78 has different conformations in each monomer within a dimer, with only one forming salt bridge.

\*\* - estimated by PDBePISA server.

**Supplementary Table S5.** Residues stabilizing CG2712 ZAD homodimer along MD trajectory.

| <b>Polar residues</b>                                                          |                   |                |
|--------------------------------------------------------------------------------|-------------------|----------------|
| Donor                                                                          | Acceptor          | Occupancy      |
| <b>ARG91-Side</b>                                                              | <b>GLU58-Side</b> | <b>199.97%</b> |
| SER76-Side                                                                     | SER76-Side        | 85.51%         |
| SER82-Side                                                                     | VAL16-Main        | 67.22%         |
| LYS80-Side                                                                     | SER50-Main        | 44.71%         |
| <i>HIS84-Side</i>                                                              | <i>SER50-Main</i> | <i>41.11%</i>  |
| LYS80-Side                                                                     | CYS49-Main        | 13.29%         |
| <b>LYS72-Side</b>                                                              | <b>GLU78-Side</b> | <b>6.49%</b>   |
| <b>ARG88-Side</b>                                                              | <b>GLU53-Side</b> | <b>3.58%</b>   |
| <b>Hydrophobic residues</b>                                                    |                   |                |
| K72, L75, P60, R88, V83, F79, L90, I45, V16, L73, L61, L52, H18, L46, M86, P62 |                   |                |

Contacts in bold are salt bridges.

Contacts in italic are found in X-ray structure of CG2712 ZAD homodimer and listed in the Table S4 above.

**Supplementary Table S6.** Residues stabilizing Zw5 ZAD homodimer along MD trajectory.

| <b>Polar residues</b>                                                      |                   |                |
|----------------------------------------------------------------------------|-------------------|----------------|
| Donor                                                                      | Acceptor          | Occupancy      |
| <b>ARG15-Side</b>                                                          | <b>ASP87-Side</b> | <b>139.61%</b> |
| SER86-Side                                                                 | THR16-Main        | 41.32%         |
| <b>ARG91-Side</b>                                                          | <b>GLU54-Side</b> | <b>36.49%</b>  |
| <b>ARG91-Side</b>                                                          | <b>ASP57-Side</b> | <b>28.26%</b>  |
| <b>ARG19-Side</b>                                                          | <b>ASP85-Side</b> | <b>25.69%</b>  |
| SER86-Side                                                                 | ARG15-Main        | 15.89%         |
| ARG15-Side                                                                 | SER86-Side        | 15.32%         |
| SER86-Side                                                                 | THR18-Side        | 14.72%         |
| LYS80-Side                                                                 | THR49-Main        | 12.44%         |
| LYS80-Side                                                                 | CYS48-Main        | 9.29%          |
| ALA59-Main                                                                 | LEU90-Main        | 7.95%          |
| LEU92-Main                                                                 | ASP57-Side        | 2.99%          |
| ARG91-Side                                                                 | PRO55-Main        | 1.56%          |
| GLN75-Side                                                                 | GLN75-Side        | 1.49%          |
| LEU92-Main                                                                 | ASP57-Main        | 1.34%          |
| LEU51-Main                                                                 | GLY50-Main        | 1.14%          |
| ARG91-Side                                                                 | SER52-Side        | 1.13%          |
| <b>ARG19-Side</b>                                                          | <b>ASP85-Main</b> | <b>1.13%</b>   |
| <b>Hydrophobic residues</b>                                                |                   |                |
| F79, L90, L72, A76, L45, L73, L52, M61, V83, P62, A59, L92, P55, I65, M82. |                   |                |

Contacts in bold are salt bridges.

**Supplementary Table S7.** Residues stabilizing CG2712-Zw5 ZAD heterodimer along MD trajectory.

| <b>Polar residues</b>                                           |                   |               |
|-----------------------------------------------------------------|-------------------|---------------|
| Donor<br>(CG2712)                                               | Acceptor<br>(Zw5) | Occupancy     |
| <b>ARG91-Side</b>                                               | <b>GLU58-Side</b> | <b>99.99%</b> |
| <b>ARG91-Side</b>                                               | <b>GLU54-Side</b> | <b>75.70%</b> |
| SER82-Side                                                      | THR16-Main        | 37.38%        |
| LYS80-Side                                                      | THR49-Main        | 27.31%        |
| HIS84-Side                                                      | THR49-Main        | 12.85%        |
| LYS80-Side                                                      | SER50-Main        | 7.50%         |
| SER86-Side                                                      | ARG15-Main        | 4.64%         |
| HIS18-Side                                                      | SER86-Side        | 3.58%         |
| SER86-Side                                                      | VAL16-Main        | 3.30%         |
| <b>ARG15-Side</b>                                               | <b>ASP87-Side</b> | <b>4.08%</b>  |
| ARG91-Side                                                      | SER52-Main        | 2.27%         |
| LYS72-Side                                                      | GLN75-Side        | 1.86%         |
| <b>Hydrophobic residues</b>                                     |                   |               |
| CG2712: V16, L46, L52, F60, L61, P62, L73, L75, F79, V83, L90   |                   |               |
| Zw5: L45, L51, M61, P62, L72, L73, A76, F79, M82, V83, I84, L90 |                   |               |

Contacts in bold are salt bridges.

**Supplementary Table S8.** Residues stabilizing CG2712- dv2712 ZAD heterodimer along MD trajectory.

| <b>Polar residues</b>                                              |                      |               |
|--------------------------------------------------------------------|----------------------|---------------|
| Donor<br>(dv2712)                                                  | Acceptor<br>(CG2712) | Occupancy     |
| <b>ARG93-Side</b>                                                  | <b>GLU58-Side</b>    | <b>98.91%</b> |
| THR88-Side                                                         | VAL16-Main           | 95.40%        |
| ARG85-Side                                                         | VAL20-Main           | 20.45%        |
| LYS80-Side                                                         | ASN53-Side           | 16.51%        |
| LYS82-Side                                                         | SER50-Main           | 15.00%        |
| <b>ARG91-Side</b>                                                  | <b>GLU60-Side</b>    | <b>13.41%</b> |
| ARG85-Side                                                         | ASN22-Side           | 11.30%        |
| HSE84-Side                                                         | ALA52-Main           | 8.06%         |
| LYS80-Side                                                         | CYS51-Main           | 6.19%         |
| LYS80-Side                                                         | ALA52-Main           | 5.44%         |
| <b>ARG15-Side</b>                                                  | <b>ASP89-Side</b>    | <b>1.81%</b>  |
| LYS82-Side                                                         | CYS49-Main           | 1.58%         |
| <b>LYS72-Side</b>                                                  | <b>GLU80-Side</b>    | <b>1.58%</b>  |
| LYS72-Side                                                         | GLN77-Side           | 1.47%         |
| ARG93-Side                                                         | GLU53-Main           | 1.37%         |
| ARG85-Side                                                         | CYM21-Side           | 1.09%         |
| <b>Hydrophobic residues</b>                                        |                      |               |
| dv2712: V20, L48, A52, L54, F62, L63, L74, L75, V78, F81, A85, L86 |                      |               |
| CG2712: V16, L46, L52, L61, P62, L73, L75, F79, V83, M86, I89, L90 |                      |               |



# SUPPLEMENTARY FIGURES

**Supplementary Figure S1.** Multiple sequence alignment of *D. melanogaster* ZAD domains. Amino acids are numbered according to the consensus sequence in the alignment. The sequence logo for the alignment is shown in the Supplementary Figure S5.

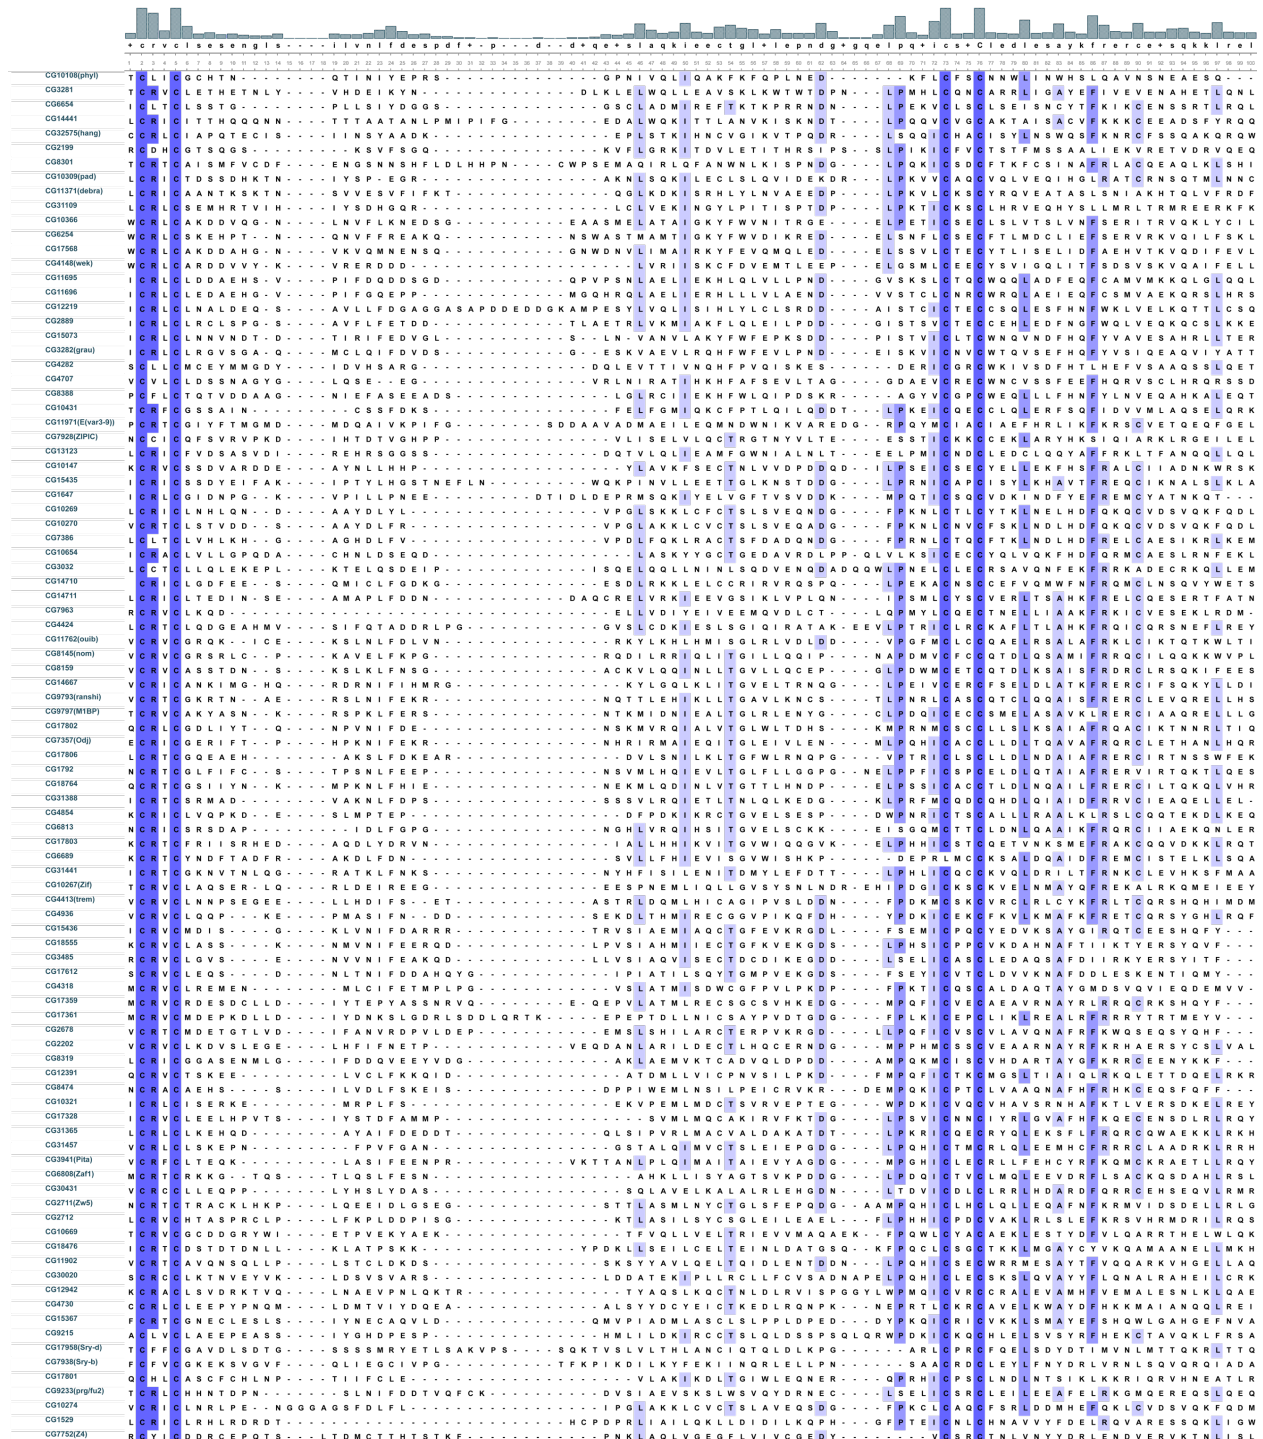

**Supplementary Figure S2.** Clustering of ZAD-domains. Values at branching points represent bootstrap confidence values. The number of exons encoding ZADs is indicated by color.

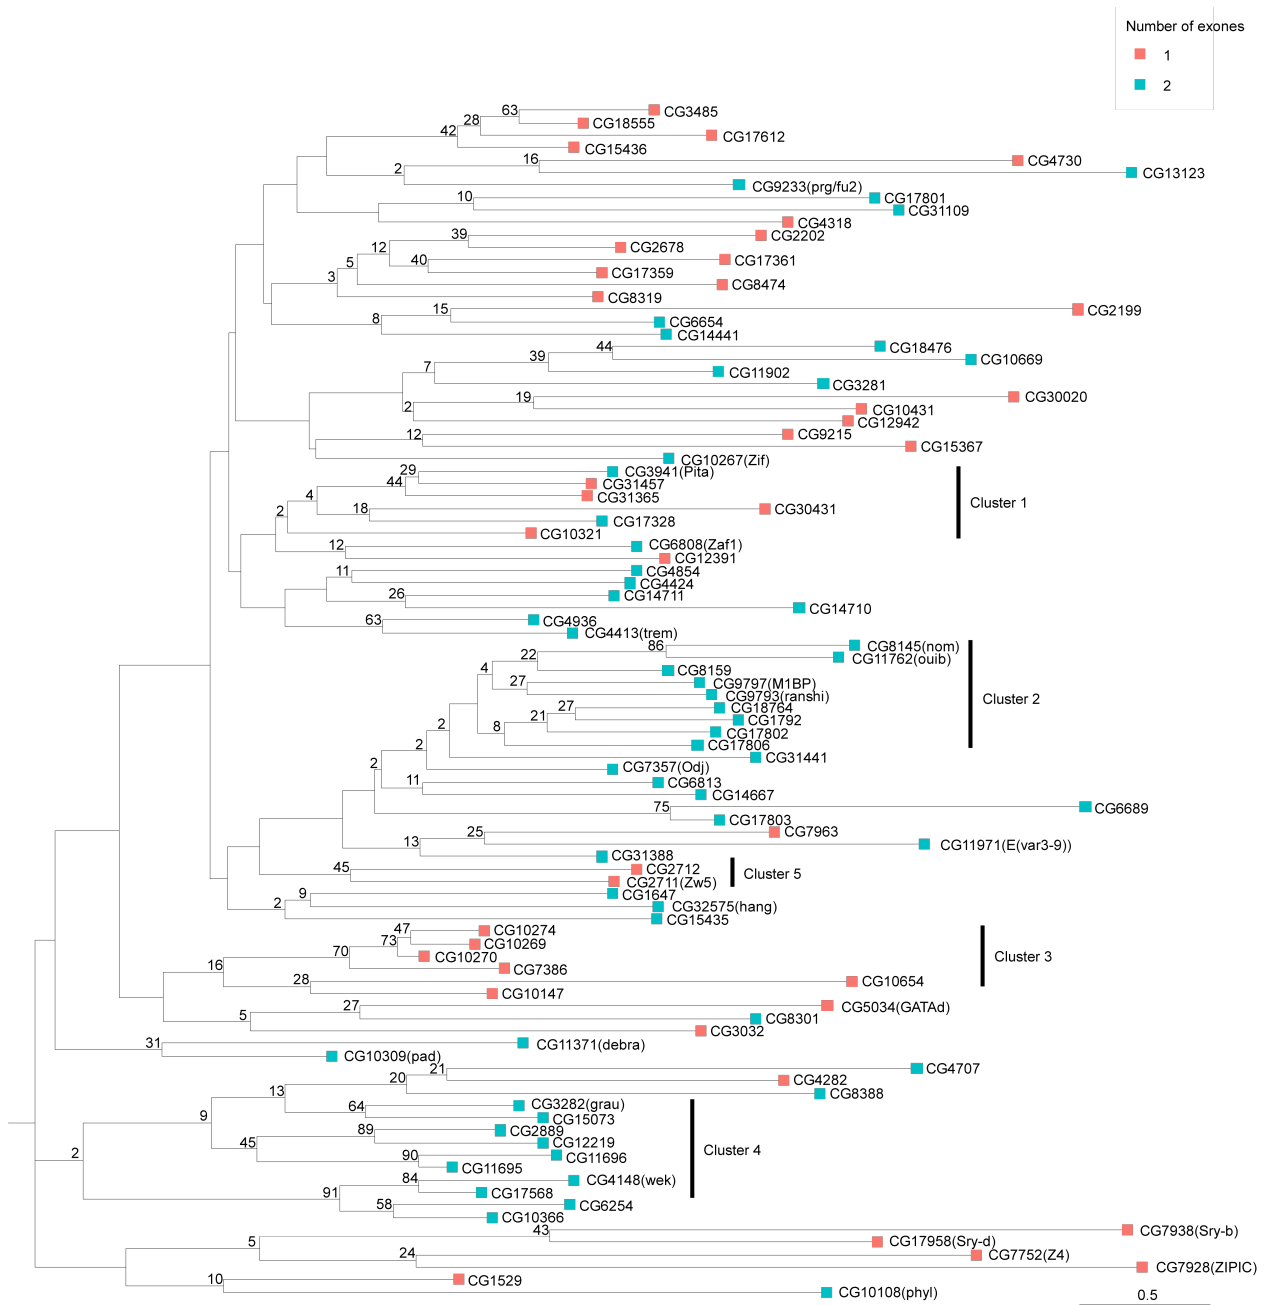

**Supplementary Figure S3.** Yeast two-hybrid assay results. AD stands for GAL4 Activation Domain, BD – GAL4 DNA-binding Domain. Cluster numbering is according to the Supplementary Table S3.

Cluster 1

|                   | BD CG31365 (1-103) |   |
|-------------------|--------------------|---|
| AD CG31365(1-103) | 1                  | + |
| AD CG31457(1-90)  | 2                  | - |
| AD CG3941(1-111)  | 3                  | - |
| AD                | 4                  | - |

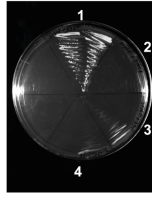

|                   | BD CG3941 (1-111) |   |
|-------------------|-------------------|---|
| AD CG3941(1-111)  | 1                 | + |
| AD CG31457(1-90)  | 2                 | + |
| AD CG31365(1-103) | 3                 | - |
| AD                | 4                 | - |

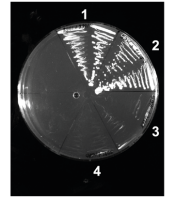

|                   | BD CG31457 (1-90) |   |
|-------------------|-------------------|---|
| AD CG31457(1-90)  | 1                 | + |
| AD CG3941(1-111)  | 2                 | + |
| AD CG31365(1-103) | 3                 | - |
| AD                | 4                 | - |

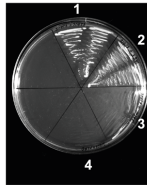

|                  | BD 17328 (1-109) |   |
|------------------|------------------|---|
| AD 17328 (1-109) | 1                | + |
| AD 10321 (1-90)  | 2                | - |
| AD               | 4                | - |

  

|                 | BD 10321 (1-90) |   |
|-----------------|-----------------|---|
| AD 10321 (1-90) | 3               | + |
| AD              | 5               | - |

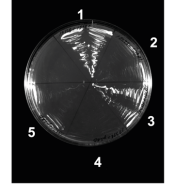

Cluster 2

|                   | BD CG8145 (1-91) |   |
|-------------------|------------------|---|
| AD CG8145(1-91)   | 1                | + |
| AD CG11762(1-83)  | 2                | - |
| AD CG8159(1-93)   | 3                | + |
| AD CG9793(1-124)  | 4                | - |
| AD CG9797 (9-114) | 5                | - |
| AD                | 6                | - |

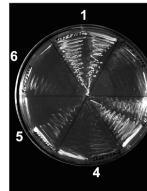

|                   | BD CG8159 (1-93) |   |
|-------------------|------------------|---|
| AD CG8159(1-93)   | 1                | + |
| AD CG8145(1-91)   | 2                | + |
| AD CG9797 (9-114) | 3                | + |
| AD CG11762(1-83)  | 4                | - |
| AD CG9793(1-124)  | 5                | - |
| AD                | 6                | - |

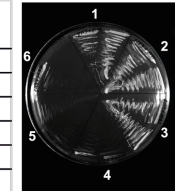

|                   | BD 18764 (1-96) |   |
|-------------------|-----------------|---|
| AD CG18764(1-96)  | 1               | + |
| AD CG1792(1-98)   | 2               | + |
| AD CG9793(1-124)  | 3               | - |
| AD CG9797 (9-114) | 4               | - |
| AD                | 5               | - |

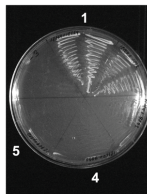

|                   | BD CG11762 (1-83) |   |
|-------------------|-------------------|---|
| AD CG11762(1-83)  | 1                 | + |
| AD CG8145(1-91)   | 2                 | - |
| AD CG8159(1-93)   | 3                 | - |
| AD CG9793(1-124)  | 4                 | - |
| AD CG9797 (9-114) | 5                 | - |
| AD                | 6                 | - |

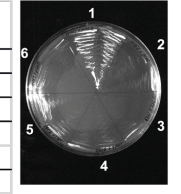

|                   | BD CG1792(1-98) |   |
|-------------------|-----------------|---|
| AD CG1792(1-98)   | 1               | + |
| AD CG18764(1-96)  | 2               | + |
| AD CG9797 (9-114) | 3               | - |
| AD CG9793(1-124)  | 4               | - |
| AD                | 5               | - |

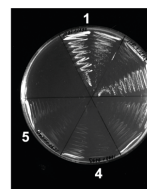

|                   | BD CG9797 (9-114) |   |
|-------------------|-------------------|---|
| AD CG9797 (9-114) | 1                 | + |
| AD CG8159(1-93)   | 2                 | + |
| AD CG18764(1-96)  | 3                 | - |
| AD CG9793(1-124)  | 4                 | - |
| AD CG11762(1-83)  | 5                 | - |
| AD CG1792(1-98)   | 6                 | - |
| AD CG8145(1-91)   | 7                 | - |
| AD                | 8                 | - |

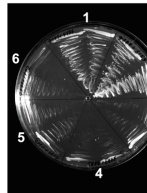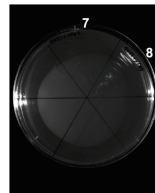

|                   | BD CG9793(1-124) |   |
|-------------------|------------------|---|
| AD CG9793(1-124)  | 1                | + |
| AD CG8159(1-93)   | 2                | - |
| AD CG11762(1-83)  | 3                | - |
| AD CG18764(1-96)  | 4                | - |
| AD CG9797 (9-114) | 5                | - |
| AD CG8145(1-91)   | 6                | - |
| AD CG1792(1-98)   | 7                | - |
| AD                | 8                | - |

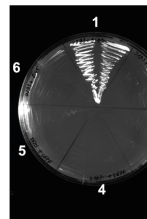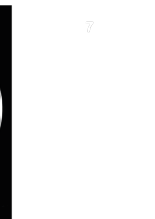

Cluster 3

|                    | BD CG7386 (1-101) |   |
|--------------------|-------------------|---|
| AD CG7386(1-101)   | 1                 | + |
| AD CG10269(1-107)  | 2                 | + |
| AD CG10270(1-111)  | 3                 | + |
| AD CG10274(1-97)   | 4                 | - |
| AD CG10654(29-135) | 5                 | - |
| AD                 | 6                 | - |

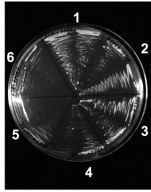

|                    | BD CG10269 (1-107) |   |
|--------------------|--------------------|---|
| AD CG10269(1-107)  | 1                  | + |
| AD CG10270(1-111)  | 2                  | + |
| AD CG10274(1-97)   | 3                  | + |
| AD CG7386(1-101)   | 4                  | + |
| AD CG10654(29-135) | 5                  | - |
| AD                 | 6                  | - |

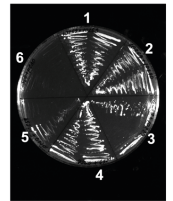

|                    | BD CG10270 (1-111) |   |
|--------------------|--------------------|---|
| AD CG10270(1-111)  | 1                  | + |
| AD CG10269(1-107)  | 2                  | + |
| AD CG10274(1-97)   | 3                  | + |
| AD CG7386(1-101)   | 4                  | + |
| AD CG10654(29-135) | 5                  | - |
| AD                 | 6                  | - |

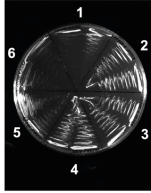

|                    | BD CG10274 (1-97) |   |
|--------------------|-------------------|---|
| AD CG10274(1-97)   | 1                 | + |
| AD CG10270(1-111)  | 2                 | + |
| AD CG10269(1-107)  | 3                 | + |
| AD CG7386(1-101)   | 4                 | - |
| AD CG10654(29-135) | 5                 | - |
| AD                 | 6                 | - |

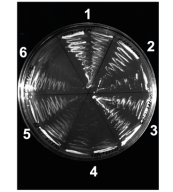

|                    | BD CG10654 (29-135) |   |
|--------------------|---------------------|---|
| AD CG10654(29-135) | 1                   | + |
| AD CG7386(1-101)   | 2                   | - |
| AD CG10269(1-107)  | 3                   | - |
| AD CG10270(1-111)  | 4                   | - |
| AD CG10274(1-97)   | 5                   | - |
| AD                 | 6                   | - |

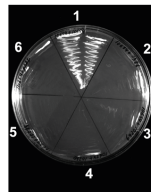

Cluster 4

|                   | BD CG4148 (1-90) |   |
|-------------------|------------------|---|
| AD CG4148(1-90)   | 1                | + |
| AD CG17568(1-91)  | 2                | - |
| AD CG33133(1-125) | 3                | - |
| AD CG15073(1-95)  | 4                | - |
| AD CG11695(1-89)  | 5                | - |
| AD CG11696(1-95)  | 6                | - |
| AD                | 7                | - |

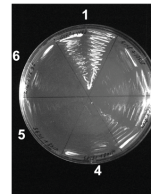

|                   | BD CG11696 (1-95) |   |
|-------------------|-------------------|---|
| AD CG11696(1-95)  | 1                 | + |
| AD CG11695(1-89)  | 2                 | + |
| AD CG15073(1-95)  | 3                 | - |
| AD CG17568(1-91)  | 4                 | - |
| AD CG33133(1-125) | 5                 | - |
| AD CG4148(1-90)   | 6                 | - |
| AD                | 7                 | - |

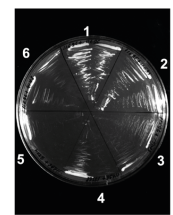

|                   | BD CG11695 (1-90) |   |
|-------------------|-------------------|---|
| AD CG11695(1-89)  | 1                 | + |
| AD CG17568(1-91)  | 2                 | + |
| AD CG33133(1-125) | 3                 | + |
| AD CG15073(1-95)  | 4                 | - |
| AD CG11695(1-89)  | 5                 | - |
| AD CG11696(1-95)  | 6                 | - |
| AD                | 7                 | - |

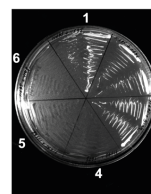

|                   | BD CG15073 (1-95) |   |
|-------------------|-------------------|---|
| AD CG15073(1-95)  | 1                 | + |
| AD CG11696(1-95)  | 2                 | - |
| AD CG4148(1-90)   | 3                 | - |
| AD CG17568(1-91)  | 4                 | - |
| AD CG33133(1-125) | 5                 | + |
| AD CG11695(1-89)  | 6                 | - |
| AD                | 7                 | - |

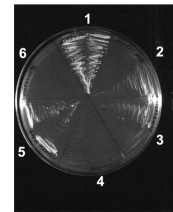

|                   | BD CG33133 (1-125) |   |
|-------------------|--------------------|---|
| AD CG33133(1-125) | 1                  | + |
| AD CG11695(1-89)  | 2                  | + |
| AD CG4148(1-90)   | 3                  | - |
| AD CG15073(1-95)  | 4                  | + |
| AD CG11696(1-95)  | 5                  | - |
| AD                | 6                  | - |

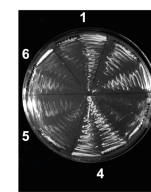

|                   | AD |   |
|-------------------|----|---|
| AD CG11695(1-89)  | 1  | - |
| AD CG11696(1-95)  | 2  | - |
| AD CG15073(1-95)  | 3  | - |
| AD CG33133(1-125) | 4  | - |
| AD CG17568(1-91)  | 5  | - |
| AD CG4148(1-90)   | 6  | - |

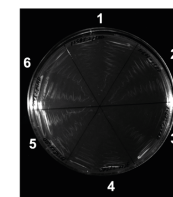

|                  | BD CG17568 (1-91) |   |
|------------------|-------------------|---|
| AD CG17568(1-91) | 1                 | + |
| AD CG4148(1-90)  | 2                 | - |
| AD CG15073(1-95) | 3                 | - |
| AD CG11696(1-95) | 4                 | - |
| AD CG11695(1-89) | 5                 | - |
| AD CG15073(1-95) | 6                 | - |

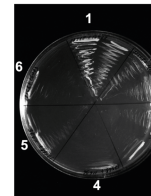

**Supplementary Figure S4.** Conservation of the residues in DNA-binding positions of zinc-fingers of ZAD-C2H2 proteins from paralogous clusters containing proteins with heterodimerizing ZADs. DNA-binding positions are shown in green. Conserved residue at these positions are shown in red. Green lines indicate heterodimerizing pairs of ZADs.

|                                                                                    | 1 Znf   | 2 Znf                | 3 Znf                | 4 Znf                | 5 Znf                | 6 Znf                | 7 Znf                | 8 Znf                | 9 Znf                | 10 Znf               | 11 Znf               | 12 Znf               |                      |
|------------------------------------------------------------------------------------|---------|----------------------|----------------------|----------------------|----------------------|----------------------|----------------------|----------------------|----------------------|----------------------|----------------------|----------------------|----------------------|
|   | CG10269 | -1123456<br>KAIRYEEH | -1123456<br>TANGLRIH | -1123456<br>RVRLLTFH | -1123456<br>CPTALKKH | -1123456<br>INSALRDH | -1123456<br>TRQEWNAH | -1123456<br>NKQALSNH | -1123456<br>KSHACKVH | -1123456<br>CEKSLTKH | -1123456<br>NIGNMKLH | -1123456<br>KAQLLRHH | -1123456<br>QETALKKH |
|                                                                                    | CG10270 | KAIRYEEH             | TANGLRVH             | RPVLLSFH             | CPTALKKH             | INSVLRDH             | TRQEWNKH             | NKQALANH             | KSHACKIH             | FEKGLTKH             | HVSNMKLH             | KAQLLRHH             | QEQVLKTH             |
|                                                                                    | CG10274 | KAIRYEEH             | TAGLRLH              | RIRLLTFH             | CFMALKKH             | INSALRDH             | TRQEWNTH             | NKQSLANH             | KSHACKIH             | YPKSLTKH             | NIGNMKRH             | KAQLLRHH             | QETALKKH             |
|                                                                                    | CG7386  | KQSKFEH              | TAGALRLH             | RRLRLTFH             | CFVAMKKH             | INSALKNH             | TRQEWKTH             | TKRVLESH             | KAYACKIH             | HSESLNNH             | SIGNMKRH             | NSQSVKQH             | QVAALIRH             |
|                                                                                    | CG10654 | KPSLLEAH             | RANLLESH             | RNSLEKTH             | RKAHLTRH             | TKENMVDH             | NSVELNAH             |                      |                      |                      |                      |                      |                      |
|   | CG9797  | -1123456<br>GRMAFELH | -1123456<br>TTSELKSH | -1123456<br>DYTTRVKH | -1123456<br>TGYLLKNH | -1123456<br>LPTHLSTH |                      |                      |                      |                      |                      |                      |                      |
|                                                                                    | CG9793  | DRISFILH             | TPAELKSH             | DYSTRVKH             | TSYLLKNH             | RYTHLSTH             |                      |                      |                      |                      |                      |                      |                      |
|                                                                                    | CG8145  | NKSSLVRH             | VAGELKAH             | SVVGRKSH             | RTCILKAH             | LKHLATH              |                      |                      |                      |                      |                      |                      |                      |
|                                                                                    | CG8159  | CKSSPDRH             | SSGELKSH             | NYSGRKSH             | NSYLLKNH             | RPTHLSTH             |                      |                      |                      |                      |                      |                      |                      |
|                                                                                    | CG11762 | SKPTPQRH             | SAGELRAH             | SYMRLIHH             | TAVVLRKH             | RKAHLVTH             |                      |                      |                      |                      |                      |                      |                      |
|   | CG1792  | CPSNFKLH             | TATLLRSH             | NASGRIQH             | MSGKLRTH             | RRSHLTSH             |                      |                      |                      |                      |                      |                      |                      |
|                                                                                    | CG18764 | DQSNFKLH             | TDHMLTLH             | NSNTRLIH             | SASGRKSH             | RNTHLKAH             |                      |                      |                      |                      |                      |                      |                      |
|   | CG17328 | -1123456<br>CIAQLTQH | -1123456<br>QKYNLKVH | -1123456<br>ALGNFQAH | -1123456<br>TAGDLSKH | -1123456<br>RRRDMRTH | -1123456<br>TADSLSLH |                      |                      |                      |                      |                      |                      |
|                                                                                    | CG10321 | QFRGLQNH             | GPGLRMH              | SKAILFRH             | SAVNLKWH             | NVDSLQLH             |                      |                      |                      |                      |                      |                      |                      |
|   | CG17568 | -1123456<br>NRASYEKH | -1123456<br>SATALKLH | -1123456<br>TITALNEH | -1123456<br>NRAPLKAH | -1123456<br>TRRTWNMH | -1123456<br>RSKYLKTH | -1123456<br>RSHKLRKH |                      |                      |                      |                      |                      |
|                                                                                    | CG4148  |                      | SFMALESH             | TFYSLVEH             | NKAPLRVH             | TRAILNRH             | NSTALKIH             | SNTNCRSH             |                      |                      |                      |                      |                      |
|   | CG11695 | -1123456<br>SRISYDVH | -1123456<br>KQFLTLTH | -1123456<br>TAVDLRLH | -1123456<br>TKQNLIVH | -1123456<br>DENSLRKH | -1123456<br>SRAKLAH  | -1123456<br>SSRSLESH | -1123456<br>NSGNMRRH |                      |                      |                      |                      |
|                                                                                    | CG11696 | DFNDLKRH             | KKFLTMH              | TKFELSAH             | SKANFLIH             | DERSLRKH             | SRAALSSH             | LPRALASH             | SHANMRRH             |                      |                      |                      |                      |
|   | CG33133 | -1123456<br>DFDGIREH | -1123456<br>KRCLIQEH | -1123456<br>NSSVLRSH | -1123456<br>RRNLELH  | -1123456<br>TEYHMVH  | -1123456<br>DKAVFEKH | -1123456<br>DEDNLKQH | -1123456<br>NSRALIGH | -1123456<br>KDISLRKH | -1123456<br>SNANMSSH |                      |                      |
|                                                                                    | CG15073 | TFLLLCRH             | KRFLTDH              | KRQCLRNH             | KQYLLDQH             | NQSLCTH              | GRAAFQRH             | NKHSLEKH             | NSRAMLSH             | KAITLRSH             | FNSNANQH             |                      |                      |
|   | CG2712  | -1123456<br>KKRTQYH  | -1123456<br>TNSPFYH  | -1123456<br>TRNARDGH | -1123456<br>QASSLRTH | -1123456<br>QKSGYKSH | -1123456<br>YSNLAH   | -1123456<br>STSELNRH | -1123456<br>RRISLAH  |                      |                      |                      |                      |
|                                                                                    | CG2711  | QRRLNQH              | HLRNKEH              | TTSSLAVH             | AFDHLRSH             | DSSSLQSH             | QKSGYKSH             | FTSNLNAH             | TKKRLASH             |                      |                      |                      |                      |
|  | CG3941  | -1123456<br>LQQLEIHH | -1123456<br>SKYDLAKH | -1123456<br>RKALLRHH | -1123456<br>SRQEMKSH | -1123456<br>FKQGLRHH | -1123456<br>TASKLARH | -1123456<br>LSHLSRHH | -1123456<br>NYNDLLDH | -1123456<br>DIDSVEHH | -1123456<br>TQKCLQRH |                      |                      |
|                                                                                    | CG31365 | TQKLLTRH             | CASSLKRH             | QREVLKRH             | QKSNLQSH             | HVSLSRHH             | DRSAVQRH             |                      |                      |                      |                      |                      |                      |

**Supplementary Figure S5.** Distribution of the residues involved in the monomer folding and dimer formation (according to crystal structures) of Grauzone and CG2712 ZADs shown at the sequence logo for all *Drosophila melanogaster* ZAD based on the multiple sequence alignment shown in the Supplementary Figure S1. Residue numbering is according to the consensus of multiple sequence alignment.

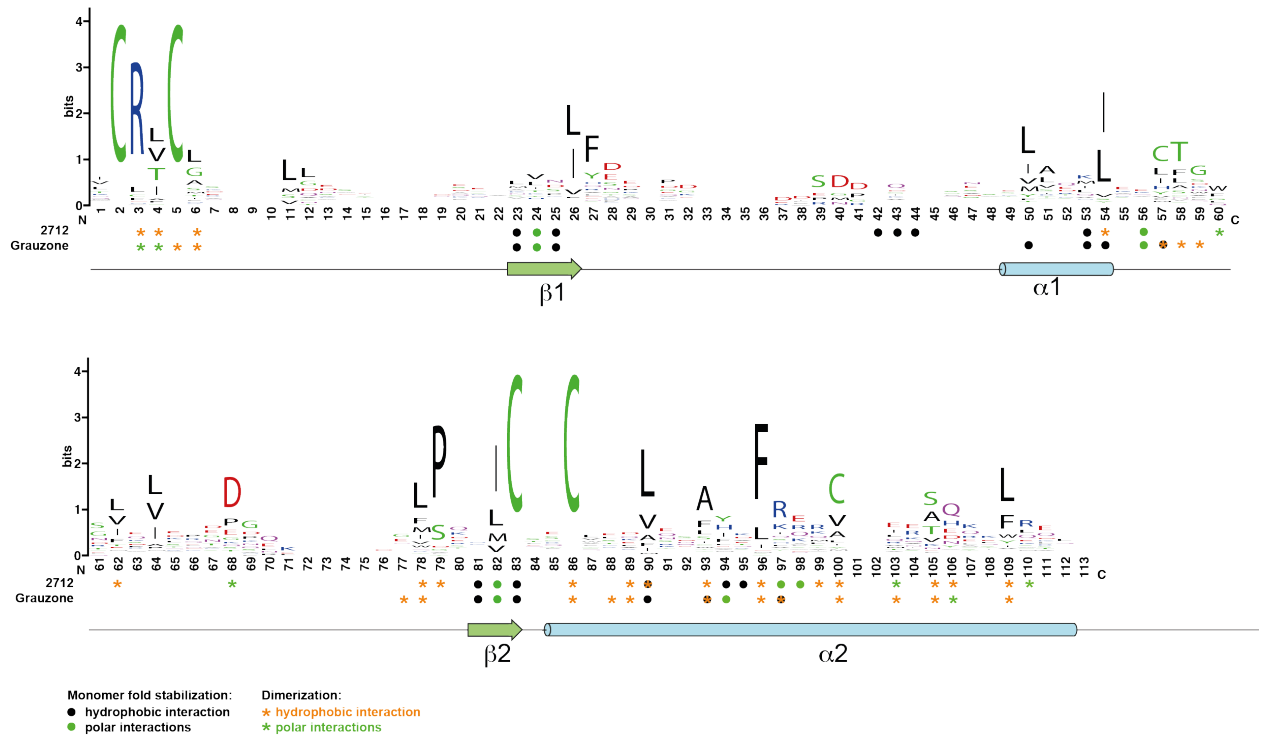



**Supplementary Figure S6. (A)** Testing of the impact of point mutations on the hetero-dimerization ability of CG2712/Zw5 proteins in MBP pull-down assay after co-expression in bacteria. Plus signs show the MBP- and 6xHis-tagged proteins co-expressed in corresponding lane. Small cartoons on the right show the positions of MBP-fused ZADs (red circle, MBP is 46kDa) and Thioredoxin-6xHis-fused ZADs (green circle, Thioredoxin-6xHis is 17kDa). **(B)** Testing of the impact of point mutations on the hetero-dimerization ability of CG2712/Zw5 ZADs in yeast two-hybrid assay.

**A**

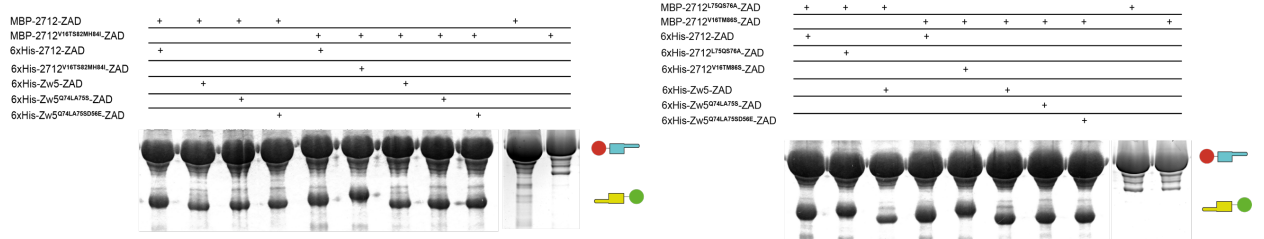

**B**

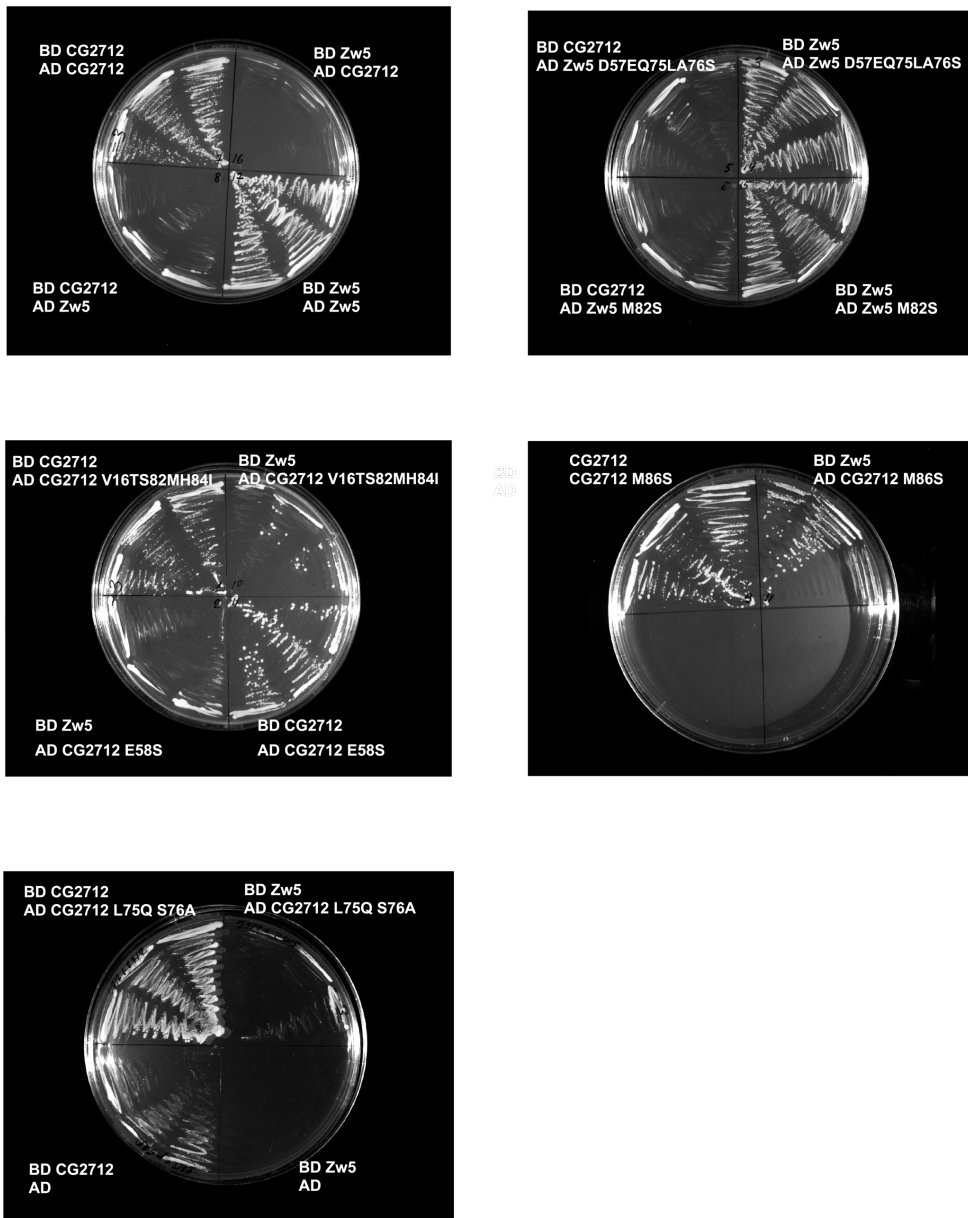

**Supplementary Figure S7.** Evaluation of RMSD along MD trajectory for corresponding dimers. Bold line shows moving average with 10 ns window.

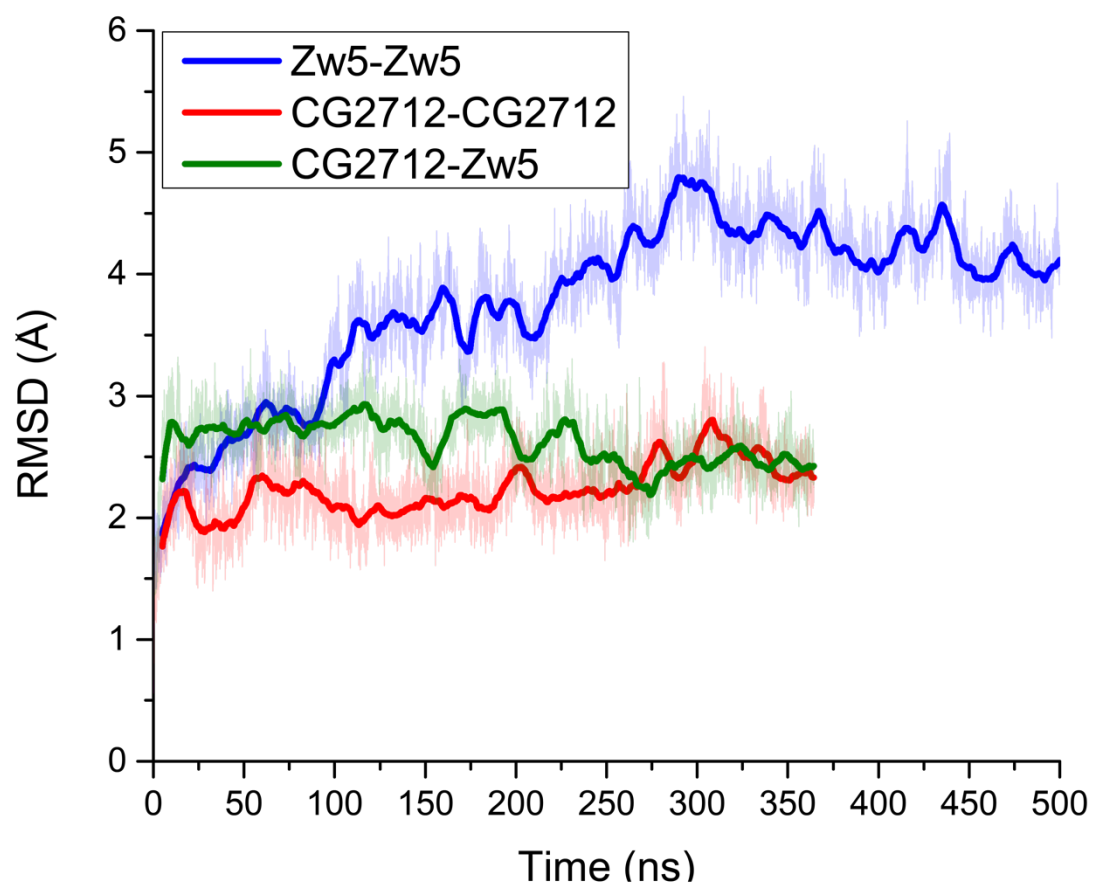



**Supplementary Figure S8.** Evolution of polar and hydrophobic interactions along MD trajectory. Bold lines show moving average with 10 ns window.

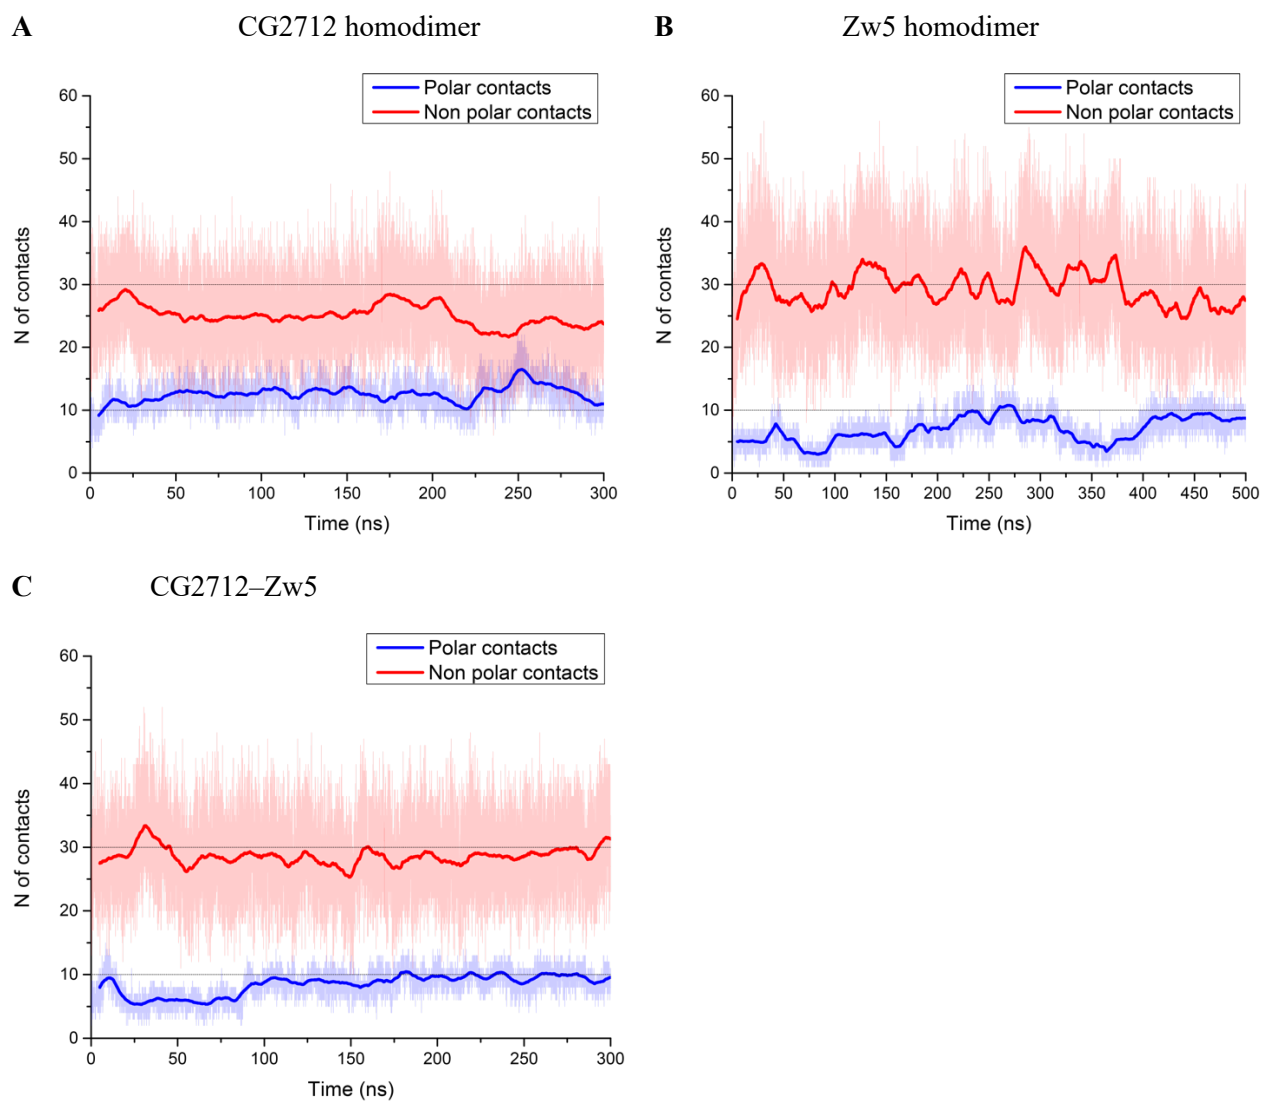

**Supplementary Figure S9.** Evolution of salt bridges of CG2712 ZAD homodimer along MD trajectory. Bold line shows moving average with 10 ns window.

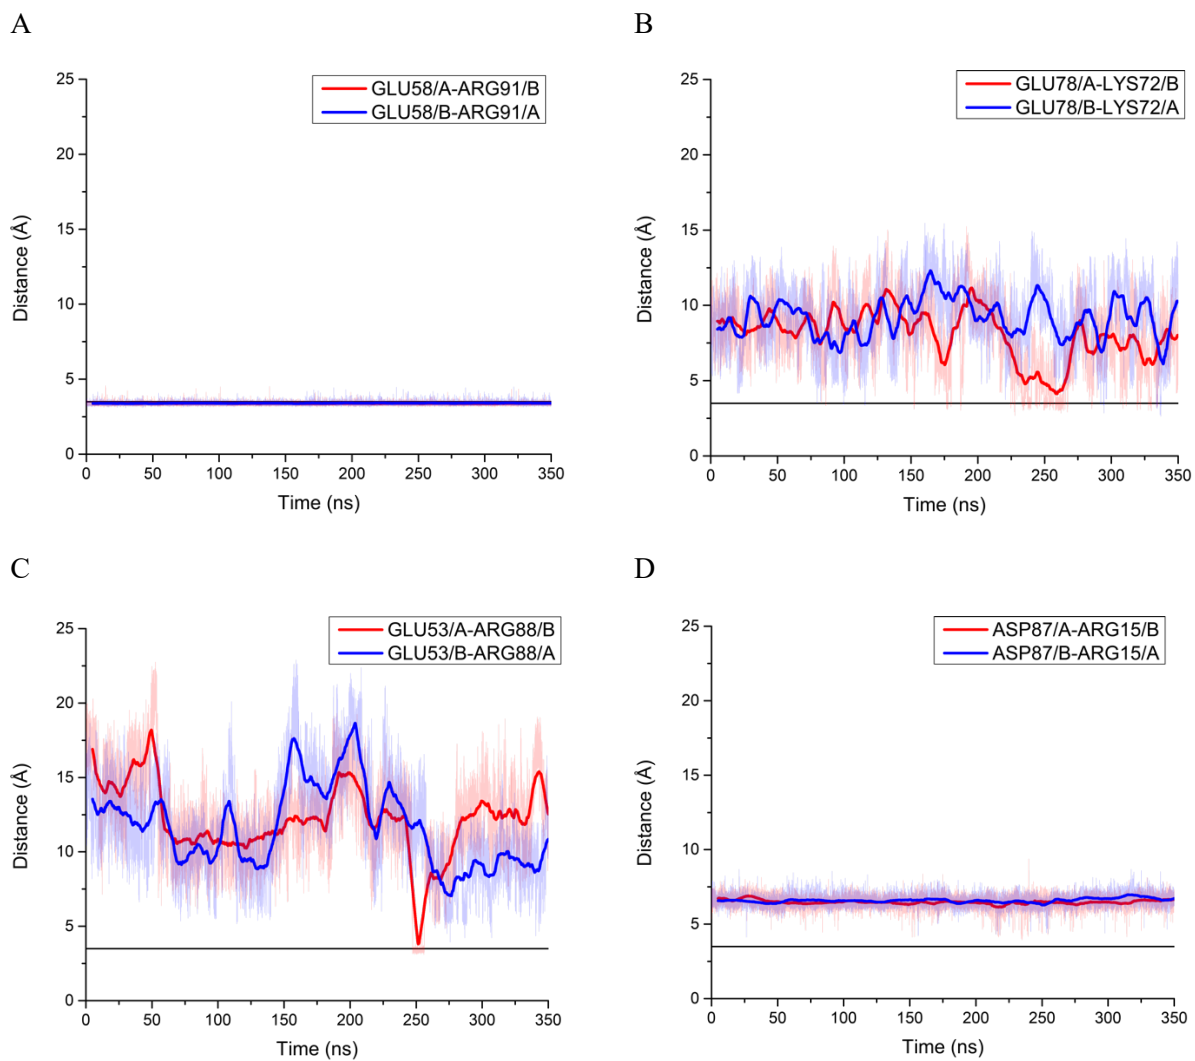

**Supplementary Figure S10.** Evolution of salt bridges of Zw5 ZAD homodimer along MD trajectory. Bold line shows moving average with 10 ns window.

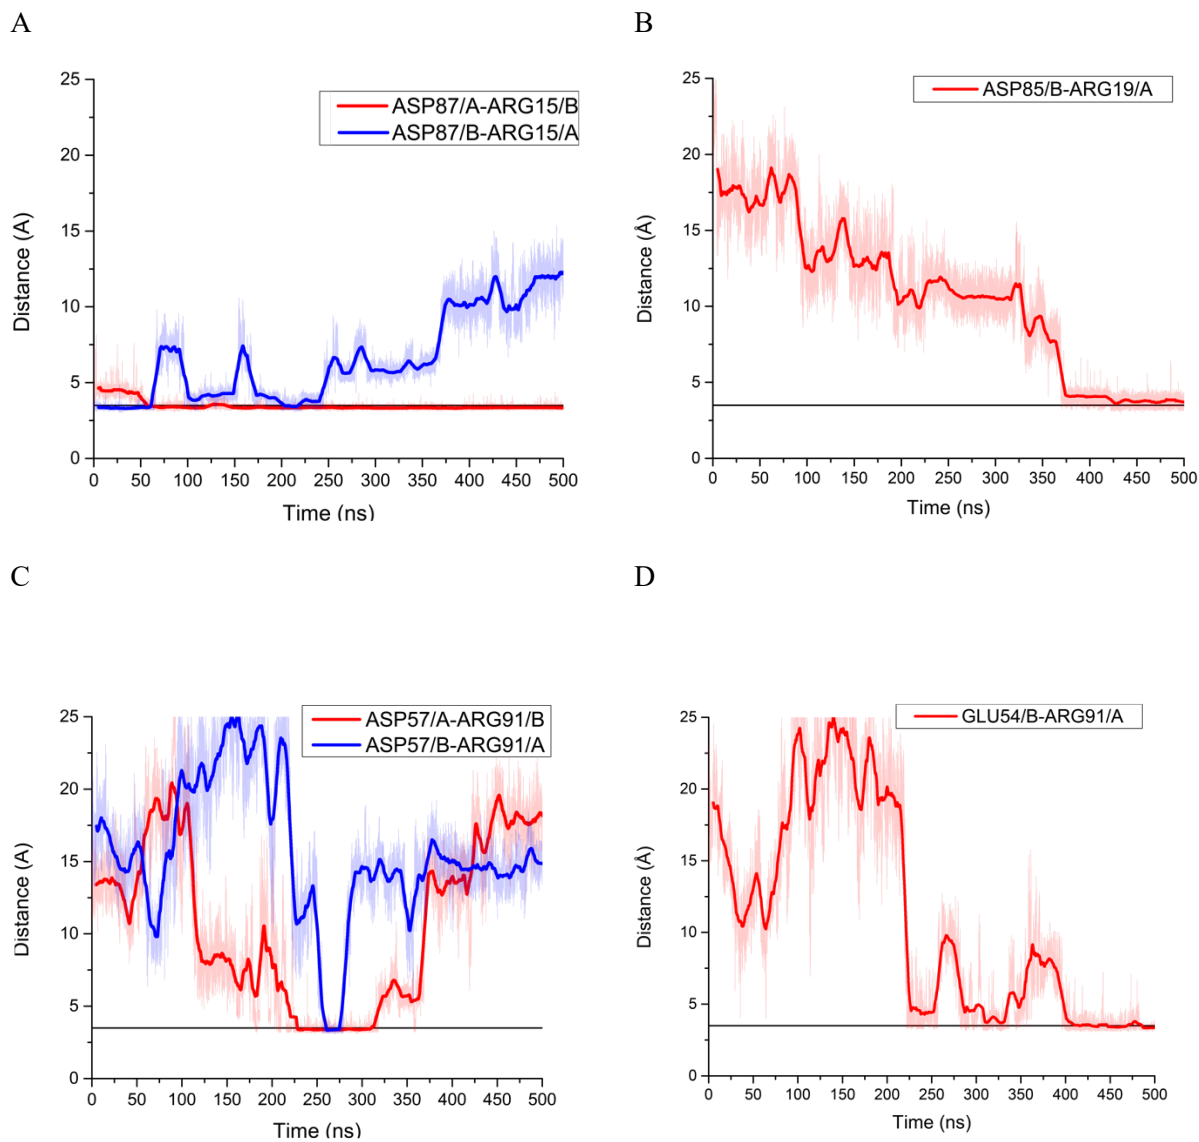

**Supplementary Figure S11.** Evolution of salt bridges of CG2712-Zw5 ZAD heterodimer along MD trajectory. Bold line shows moving average with 10 ns window.

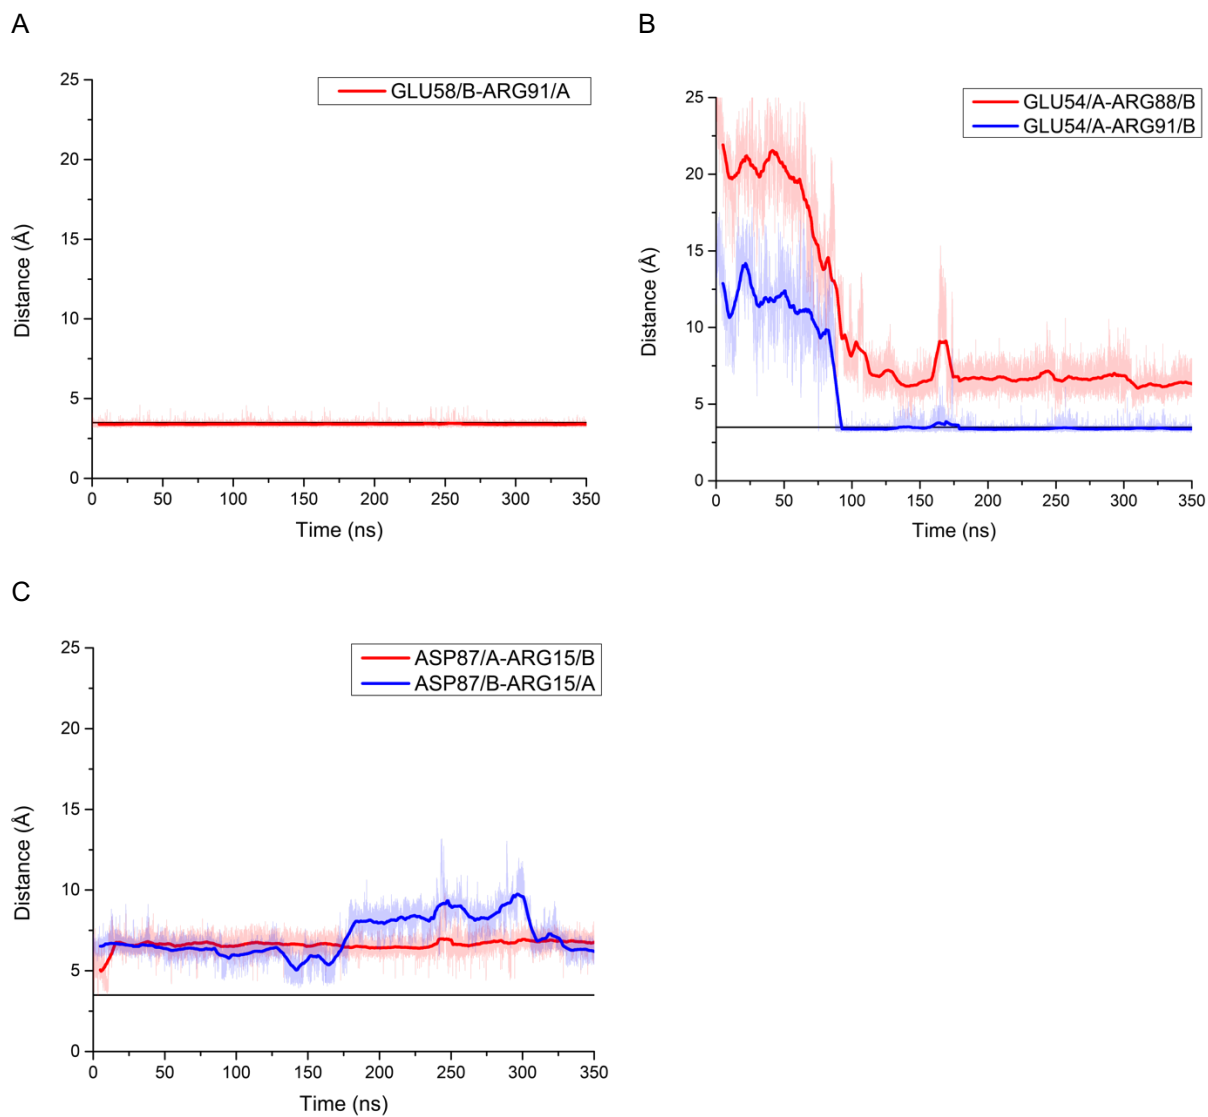

**Supplementary Figure S12. (A)** Crystal structure of CG2712 ZAD-domain colored by homology with Zw5 ZAD (identical residues are shown in red, conserved – in yellow) according to sequence alignment shown above. **(B)** PDBePISA calculation of buried surface area and dimer solvation energy contribution ( $\Delta G$ ) of residues involved in CG2712 ZAD dimerization. The  $\Delta G$  values (calculated from CG2712 ZAD structure) of residues which are identical/conserved in Zw5/dv2712/dvZw5 ZADs are shown in red/yellow (according to the alignment shown at the Figure 2). The non-conserved residues of CG2712 ZAD contributing to overall  $\Delta G$  dimer solvation energy are shown in green. Residues which are not involved in dimerization are not shown for clarity. **(C)** PDBePISA analysis of  $\Delta G$  solvation energy influence of residues involved in Zw5 dimerization (according to the model built with Robetta server), residues identical/conserved in CG2712/dv2712/dvZw5 are shown in red/yellow (according to the alignment shown at the Figure 2). In green are shown residues conserved only in Zw5/dvZw5 contributing to overall  $\Delta G$ .

**A**

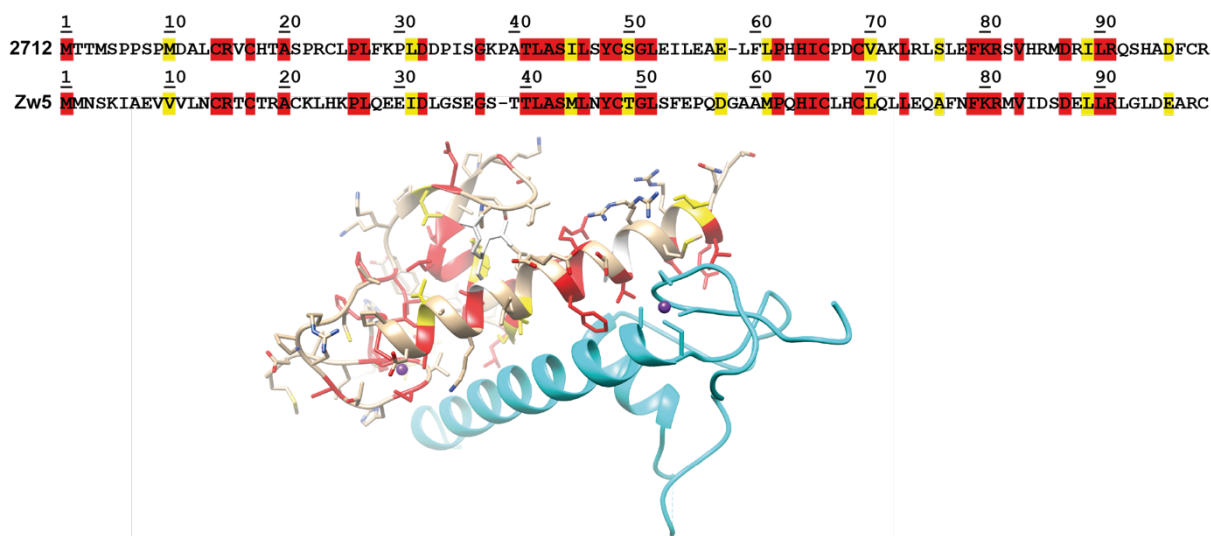

**B**

| N                           | Residue | Buried surface area | $\Delta G$ Solvation energy effect, kcal/mol | zw5   | dv2712 | dvZw5 |
|-----------------------------|---------|---------------------|----------------------------------------------|-------|--------|-------|
| 14                          | CYS     | 0.25                | 0,00                                         |       |        |       |
| 15                          | ARG     | 42.68               | -0,52                                        | -0,52 | -0,52  | -0,52 |
| 16                          | VAL     | 74.71               | 0,50                                         |       | 0,50   |       |
| 17                          | CYS     | 10.93               | 0,10                                         | 0,10  | 0,10   | 0,10  |
| 18                          | HIS     | 42.42               | 0,20                                         |       |        |       |
| 46                          | LEU     | 17.24               | 0,28                                         | 0,28  | 0,28   | 0,28  |
| 49                          | CYS     | 24.00               | -0,15                                        | -0,15 | -0,15  | -0,15 |
| 50                          | SER     | 56.74               | 0,27                                         | 0,27  | 0,27   | 0,27  |
| 51                          | GLY     | 3.75                | 0,06                                         |       |        |       |
| 52                          | LEU     | 82.77               | 1,32                                         | 1,32  | 1,32   | 1,32  |
| 53                          | GLU     | 5.92                | -0,03                                        |       |        |       |
| 54                          | ILE     | 3.01                | 0,05                                         | 0,05  | 0,05   | 0,05  |
| 58                          | GLU     | 18.99               | -0,26                                        | -0,26 | -0,26  | -0,26 |
| 61                          | LEU     | 49.53               | 0,79                                         | 0,79  | 0,79   | 0,79  |
| 62                          | PRO     | 11.39               | 0,18                                         | 0,18  | 0,18   | 0,18  |
| 65                          | ILE     | 0.50                | 0,01                                         | 0,01  | 0,01   | 0,01  |
| 69                          | CYS     | 3.02                | -0,01                                        | -0,01 | -0,01  | -0,01 |
| 72                          | LYS     | 56.33               | -0,17                                        |       |        |       |
| 73                          | LEU     | 9.11                | 0,13                                         | 0,13  | 0,13   | 0,13  |
| 75                          | LEU     | 25.75               | 0,41                                         |       |        |       |
| 76                          | SER     | 36.69               | 0,31                                         |       |        |       |
| 79                          | PHE     | 138.30              | 2,18                                         | 2,18  | 2,18   | 2,18  |
| 80                          | LYS     | 33.67               | 0,05                                         | 0,05  | 0,05   | 0,05  |
| 82                          | SER     | 13.56               | -0,04                                        |       |        |       |
| 83                          | VAL     | 71.74               | 1,14                                         | 1,14  | 1,14   | 1,14  |
| 84                          | HIS     | 43.62               | 0,09                                         |       |        |       |
| 86                          | MET     | 71.01               | 1,51                                         |       |        |       |
| 87                          | ASP     | 36.39               | -0,12                                        | -0,12 | -0,12  | -0,12 |
| 90                          | LEU     | 95.13               | 1,31                                         | 1,31  | 1,31   | 1,31  |
| 91                          | ARG     | 76.83               | -1,18                                        | -1,18 | -1,18  | -1,18 |
| Overall $\Delta G$ kcal/mol |         |                     | 16,82                                        |       |        |       |

**C**

| N                           | Residue | Buried surface area | $\Delta G$ Solvation energy effect, kcal/mol | 2712  | dv2712 | dvZw5 |
|-----------------------------|---------|---------------------|----------------------------------------------|-------|--------|-------|
| 14                          | CYS     | 0.37                | 0,00                                         |       |        |       |
| 15                          | ARG     | 36.08               | -0,42                                        | -0,42 | -0,42  | -0,42 |
| 16                          | THR     | 74.13               | 0,50                                         |       |        | 0,5   |
| 17                          | CYS     | 13.91               | 0,22                                         | 0,22  | 0,22   | 0,22  |
| 18                          | THR     | 37.38               | 0,60                                         |       |        | 0,6   |
| 45                          | LEU     | 10.14               | 0,16                                         | 0,16  | 0,16   | 0,16  |
| 48                          | CYS     | 22.41               | -0,21                                        | -0,21 | -0,21  | -0,21 |
| 49                          | THR     | 72.18               | 0,41                                         | 0,41  | 0,41   | 0,41  |
| 50                          | GLY     | 1.68                | 0,03                                         | 0,03  | 0,03   | 0,03  |
| 51                          | LEU     | 76.91               | 1,23                                         | 1,23  | 1,23   | 1,23  |
| 52                          | SER     | 11.30               | -0,12                                        | -0,12 | -0,12  | -0,12 |
| 53                          | PHE     | 8.76                | 0,14                                         | 0,14  | 0,14   | 0,14  |
| 60                          | GLN     | 28.86               | -0,36                                        |       |        | -0,36 |
| 61                          | ALA     | 41.30               | 0,41                                         |       |        | 0,41  |
| 61                          | MET     | 50.23               | 0,92                                         | 0,92  | 0,92   | 0,92  |
| 62                          | PRO     | 8.53                | 0,14                                         | 0,14  | 0,14   | 0,14  |
| 65                          | ILE     | 0.34                | 0,01                                         | 0,01  | 0,01   | 0,01  |
| 68                          | HIS     | 0.31                | 0,01                                         | 0,01  | 0,01   | 0,01  |
| 69                          | CYS     | 6.89                | 0,10                                         | 0,1   | 0,1    | 0,1   |
| 72                          | LEU     | 53.53               | 0,82                                         | 0,82  | 0,82   | 0,82  |
| 73                          | LEU     | 7.27                | 0,10                                         | 0,1   | 0,1    | 0,1   |
| 75                          | GLN     | 45.16               | -0,10                                        |       | -0,1   | -0,1  |
| 76                          | ALA     | 34.88               | 0,55                                         |       |        | 0,55  |
| 79                          | PHE     | 136.94              | 2,19                                         | 2,19  | 2,19   | 2,19  |
| 80                          | LYS     | 40.97               | 0,46                                         | 0,46  | 0,46   | 0,46  |
| 82                          | MET     | 53.07               | 1,03                                         |       |        | 1,03  |
| 83                          | VAL     | 71.00               | 1,14                                         | 1,14  |        | 1,14  |
| 84                          | ILE     | 23.11               | 0,37                                         |       | 0,37   | 0,37  |
| 86                          | SER     | 43.60               | 0,33                                         |       | 0,33   | 0,33  |
| 87                          | ASP     | 38.05               | -0,06                                        | -0,06 | -0,06  | -0,06 |
| 89                          | LEU     | 8.03                | 0,13                                         | 0,13  | 0,13   | 0,13  |
| 90                          | LEU     | 92.99               | 1,32                                         | 1,32  | 1,32   | 1,32  |
| 91                          | ARG     | 72.47               | -1,15                                        | -1,15 | -1,15  | -1,15 |
| Overall $\Delta G$ kcal/mol |         |                     | 21,80                                        | 13,50 | 14,06  | 21,80 |
